# Supplementary material for: Interplay of lamin A and lamin B LADs on the radial positioning of chromatin
Source: PubMed Central journal article supplement (PMC6363278; doi:10.1080/19491034.2019.1570810), 2019-01-20
Supplement: kncl-10-01-1570810-s001.pdf [file kncl-10-01-1570810-s001.pdf]

## Supplementary information

### Supplementary Figures

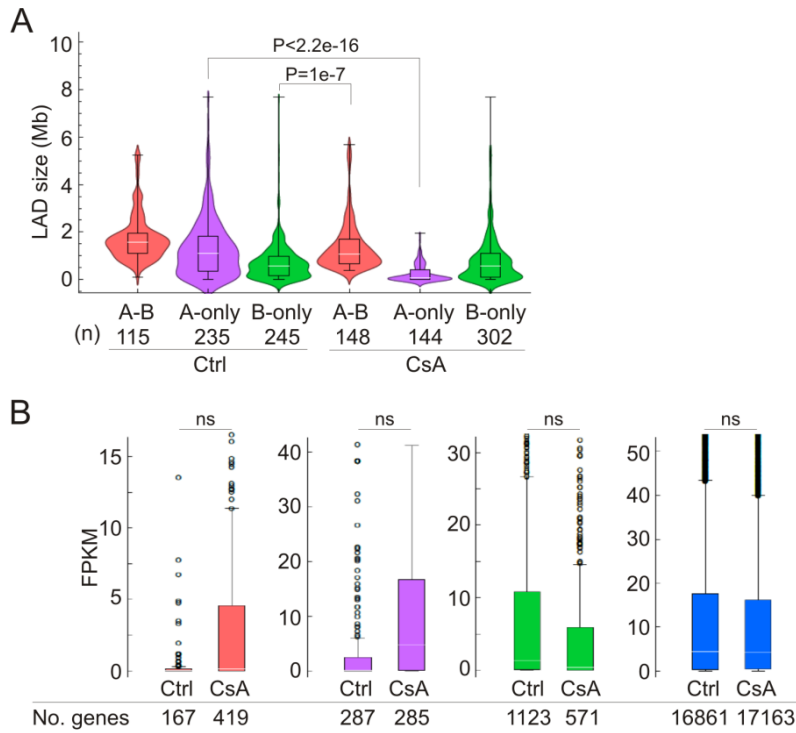

**Figure S1.** Characterization of LADs in control and CsA-treated HepG2 cells. (A) LAD size distribution, P-values shown only for significant differences (Tukey test after 2-way ANOVA.). (B) Gene expression level in each LAD class. No significant differences are detected (ns) at the  $P < 0.01$  level (unpaired t-tests). FPKM values are from duplicate RNA-seq data.

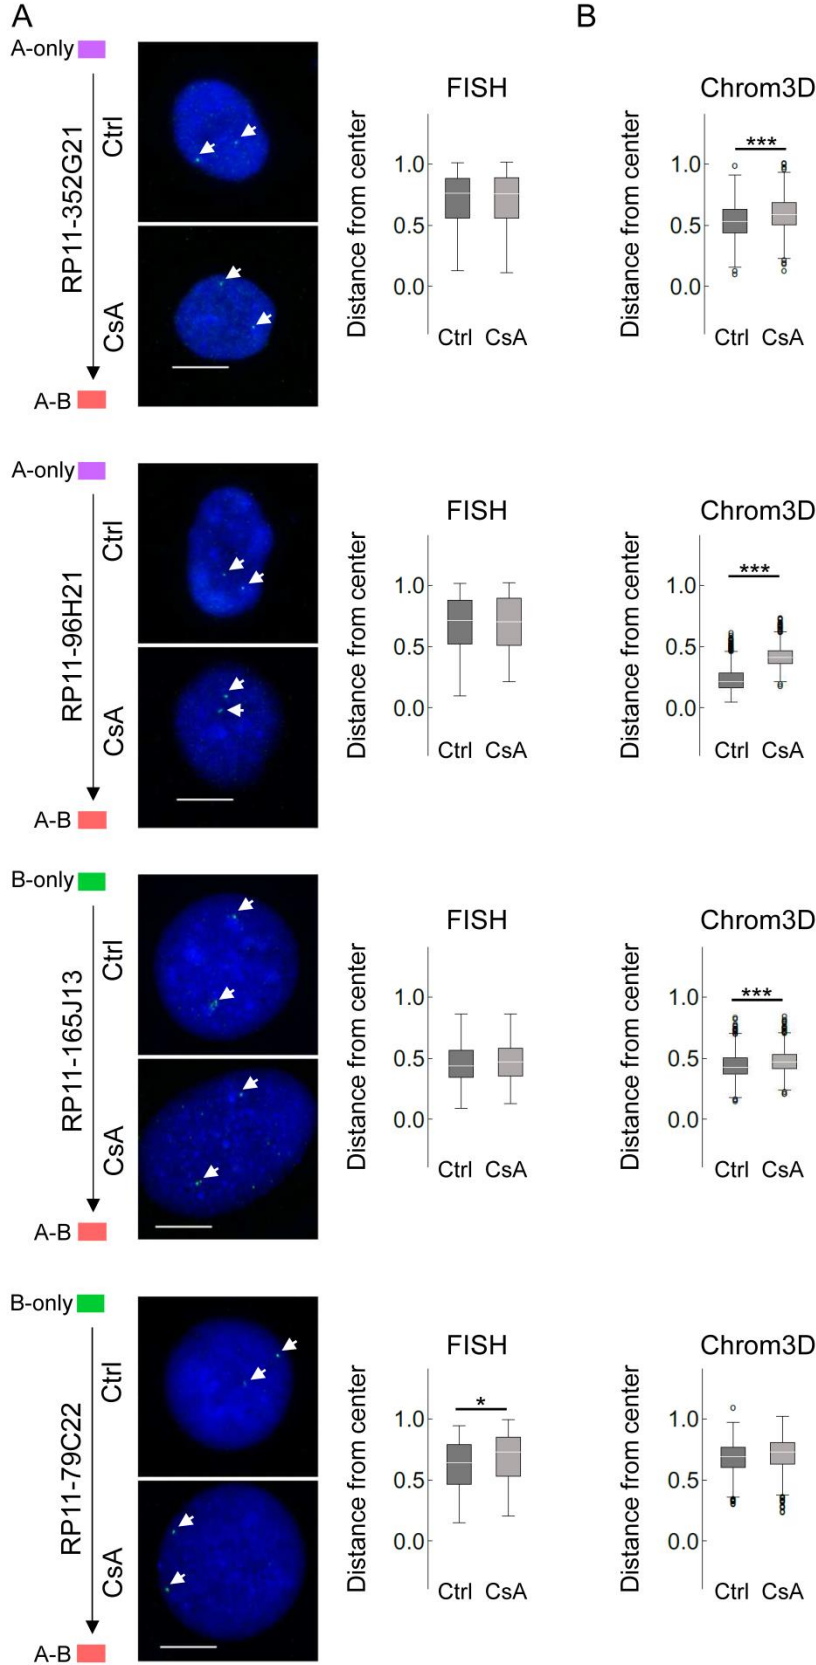

Figure S2. (part 1; legend on next page).

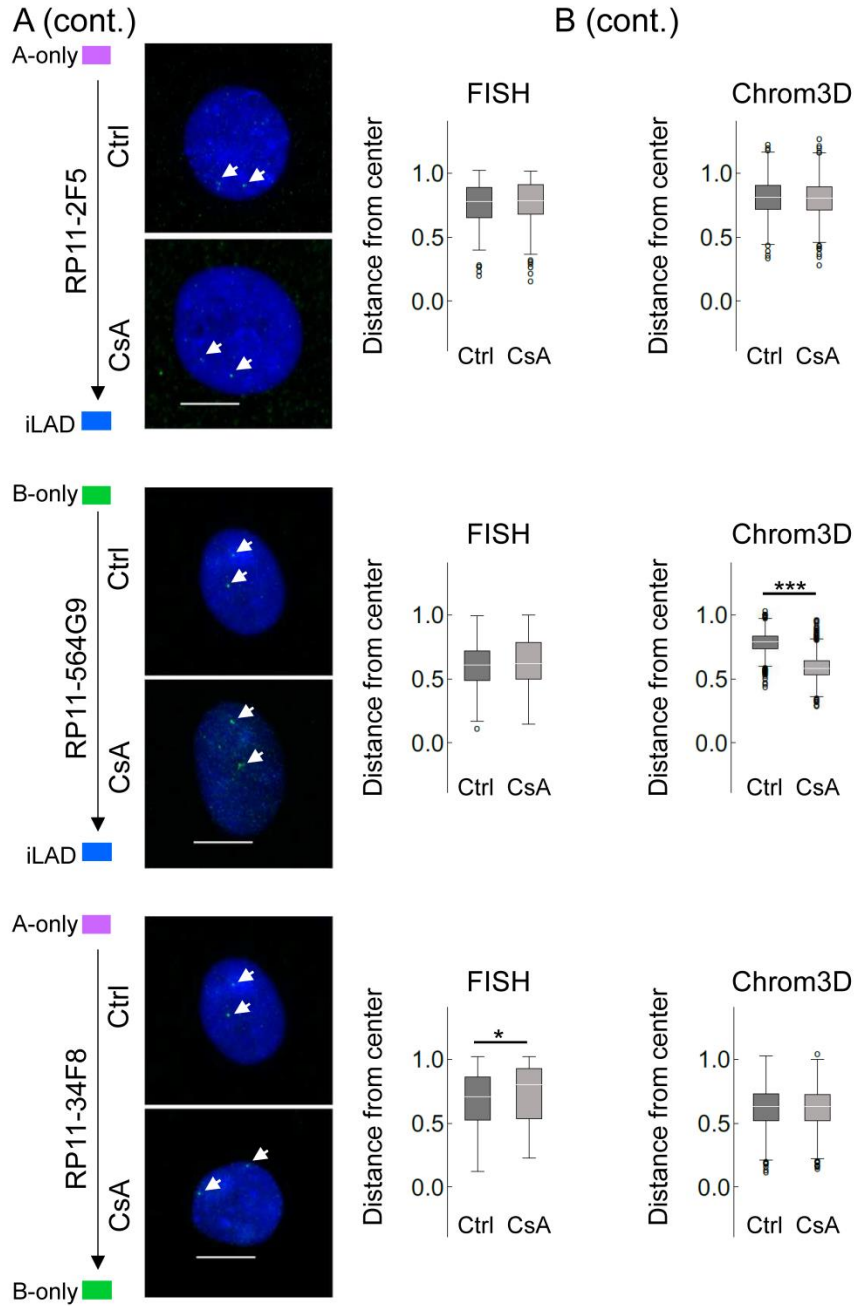

**Figure S2.** Chrom3D and FISH analysis of radial repositioning of loci after CsA treatment. (A) FISH analysis of locus positioning (arrows) in indicated LAD class in control and CsA-treated cells. Representative FISH images are shown, with normalized probe distance from the nucleus center (0 = center; 1 = periphery defined as the border of DAPI staining); n = 200 FISH signals analyzed per probe per condition; bars, 10  $\mu$ m. (B) Normalized FISH probe distance from the nucleus center measured in 800 Chrom3D models. Probe number is shown. FISH: \*P = 0.006, unpaired t-tests; Chrom3D: \*\*\*P < 2.2x10<sup>-16</sup>, unpaired t-tests.

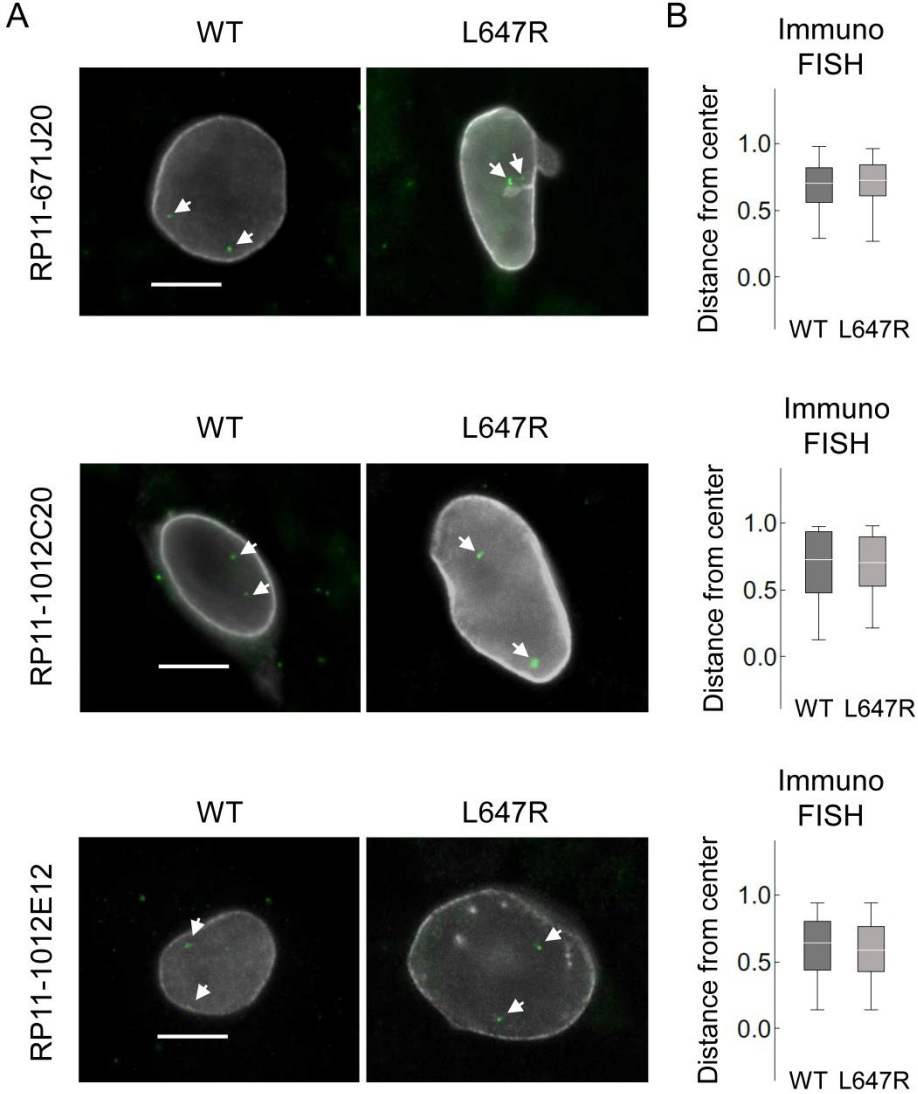

**Figure S3.** Expression of pre-lamin A wild type or pre-lamin A (L647R) in HepG2 cells does not radially relocalize loci. (A) Immuno-FISH images of positioning of indicated loci (detected by FISH probes; arrows) in HepG2 cells expressing either Flag-tagged wild-type lamin A (WT) or a Flag-tagged lamin A L647R mutant. Lamin A proteins were detected using anti-Flag antibodies. Probe number is shown; bars, 10  $\mu$ m. (B) Quantification of relative distances of FISH signals from the nucleus center (0 = center; 1 = periphery defined by the border of Flag-lamin A staining at the nucleus edge); n = ~100 nuclei per sample. Distances are not significantly different between the two cell types ( $P > 0.05$ ; unpaired t-tests.).

**Supplementary Tables****Table S1.** Gene expression level (FPKM) and LAD class in control and CsA-treated cells. (Excel)**Table S2.** Lamin A and lamin B LAD characteristics in control and CsA-treated cells.**Table S3.** Characteristics of LAD classes and inter-LADs in control and CsA-treated cells.**Table S4.** Characteristics of LAD class transitions.**Table S5.** FISH probe information.**Table S2.** Lamin A and lamin B LAD characteristics in control and CsA-treated cells.

|             | LAD class | No. LADs | Genome coverage (% mappable) | Coverage (Mb) | No. genes | Genes / Mb | Median (Mb) |
|-------------|-----------|----------|------------------------------|---------------|-----------|------------|-------------|
| <b>Ctrl</b> | A         | 244      | 17.8                         | 510.05        | 1673      | 3.28       | 1.73        |
|             | B         | 239      | 13.7                         | 392.53        | 2614      | 6.66       | 1.28        |
| <b>CsA</b>  | A         | 178      | 8.6                          | 245.55        | 1535      | 6.25       | 1.16        |
|             | B         | 278      | 16.5                         | 470.77        | 2484      | 5.28       | 1.25        |

**Table S3.** Characteristics of LAD classes and inter-LADs in control and CsA-treated cells.

|             | LAD class | No. LADs | Genome coverage (%) | Coverage (Mb) | No. genes | Genes / Mb | Median (Mb) |
|-------------|-----------|----------|---------------------|---------------|-----------|------------|-------------|
| <b>Ctrl</b> | A-B       | 115      | 7.1                 | 202.03        | 659       | 3.26       | 1.56        |
|             | A-only    | 235      | 10.8                | 308.02        | 1045      | 3.39       | 1.11        |
|             | B-only    | 245      | 6.7                 | 190.5         | 2033      | 10.67      | 0.59        |
|             | Inter-LAD | 642      | 75.5                | 2160.76       | 25633     | 11.86      | 1.24        |
| <b>CsA</b>  | A-B       | 148      | 7.3                 | 208.32        | 1118      | 5.37       | 1.08        |
|             | A-only    | 144      | 1.3                 | 37.23         | 427       | 11.47      | 0.07        |
|             | B-only    | 302      | 9.2                 | 262.46        | 1435      | 5.47       | 0.58        |
|             | Inter-LAD | 574      | 82.2                | 2353.31       | 26390     | 11.21      | 1.21        |

**Table S4.** Characteristics of LAD class transitions.

| LAD class (Ctrl) | LAD class (CsA) | No. LADs | Genome coverage (%) | Genome coverage (Mb) | No. genes | Genes / Mb | Median (Mb) |
|------------------|-----------------|----------|---------------------|----------------------|-----------|------------|-------------|
| A-B              | A-B             | 80       | 4.4                 | 127.03               | 430       | 3.38       | 1.59        |
|                  | A-only          | 13       | 0.1                 | 1.97                 | 19        | 9.65       | 0.15        |
|                  | B-only          | 79       | 2.4                 | 68.78                | 192       | 2.79       | 0.87        |
|                  | Inter-LAD       | 21       | 0.1                 | 4.24                 | 18        | 4.24       | 0.20        |
| A-only           | A-B             | 36       | 0.4                 | 12.85                | 104       | 8.09       | 0.19        |
|                  | A-only          | 32       | 0.2                 | 5.64                 | 40        | 7.09       | 0.06        |
|                  | B-only          | 97       | 2.7                 | 76.79                | 199       | 2.59       | 0.50        |
|                  | Inter-LAD       | 206      | 7.4                 | 212.74               | 702       | 3.30       | 0.70        |
| B-only           | A-B             | 106      | 2.1                 | 60.35                | 524       | 8.68       | 0.49        |
|                  | A-only          | 50       | 0.4                 | 12.37                | 163       | 13.18      | 0.06        |
|                  | B-only          | 166      | 2.8                 | 81.22                | 819       | 10.08      | 0.18        |
|                  | Inter-LAD       | 129      | 1.3                 | 36.56                | 527       | 14.42      | 0.11        |
| Inter-LAD        | A-B             | 41       | 0.3                 | 8.08                 | 60        | 10.7       | 0.07        |
|                  | A-only          | 92       | 0.6                 | 17.25                | 205       | 13.8       | 0.10        |
|                  | B-only          | 142      | 1.2                 | 35.66                | 225       | 4.4        | 0.11        |
|                  | Inter-LAD       | 676      | 73.4                | 2099.77              | 25143     | 9.7        | 1.15        |

**Table S5.** FISH probe information.

| Probe ID | Clone ID     | Change LAD class      | Chr.   | Start pos. | End pos.  | No. genes |
|----------|--------------|-----------------------|--------|------------|-----------|-----------|
| p1       | RP11-2F5     | A switch to Inter-LAD | Chr.2  | 185216500  | 185377594 | 7         |
| p2       | RP11-671J20  | Inter-LAD             | Chr.3  | 9722941    | 9900724   | 51        |
| p3       | RP11-1012C20 | B switch to Inter-LAD | Chr.1  | 2301890    | 2502158   | 95        |
| p4       | RP11-564G9   | B switch to Inter-LAD | Chr.5  | 176865042  | 177055093 | 66        |
| P5       | RP11-79C22   | A gain on B           | Chr.10 | 7304838    | 7461350   | 28        |
| P6       | RP11-165J13  | A gain on B           | Chr.17 | 77197376   | 77328294  |           |
| P7       | RP11-102E12  | A switch to B         | Chr.18 | 4467862    | 4624130   | 24        |
| P8       | RP11-34F8    | A switch to B         | Chr.11 | 40922548   | 41092384  | 2         |
| P9       | RP11-96H21   | B gain on A           | Chr.21 | 31932883   | 32103229  | 61        |
| P10      | RP11-352G21  | B gain on A           | Chr.9  | 8000830    | 8162993   | 6         |
